# Supplementary material
Source: publisher site journal article supplement (https://www.dovepress.com/get_supplementary_file.php?f=346093.docx)
Supplement: Supplementary file 1 [file get_supplementary_file.php]

**Supplementary Material**


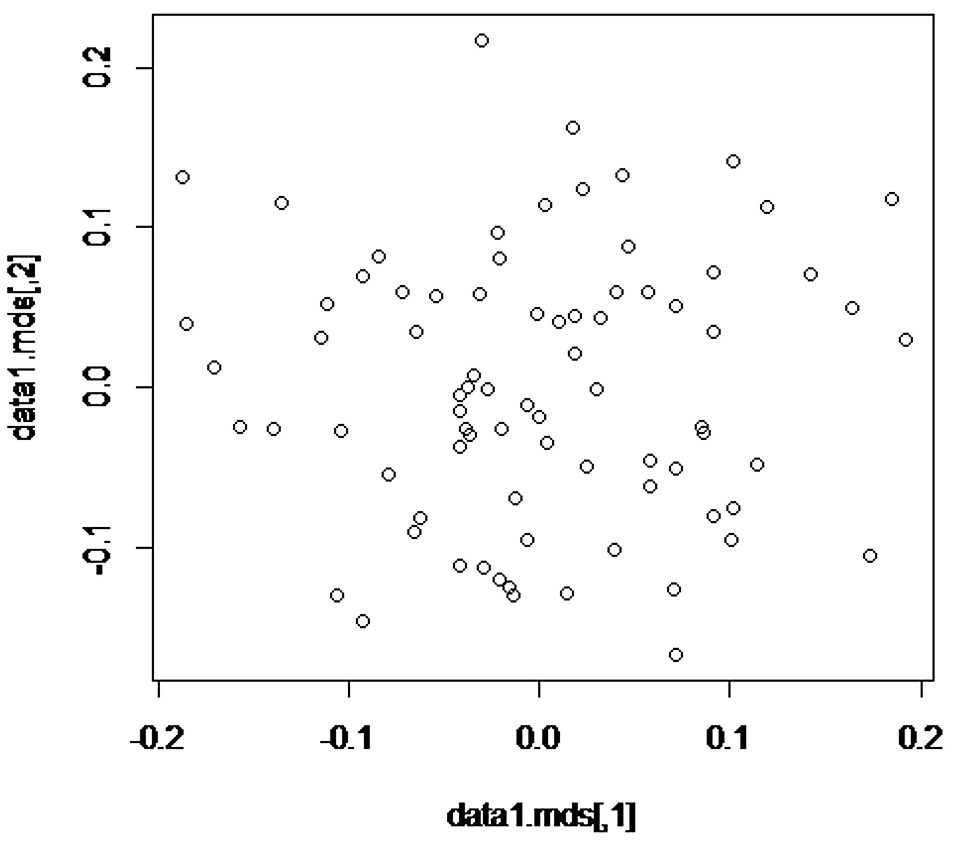


**Supplementary Figure S1**. Multidimensional scaling (MDS) plot of adjacent MDS components.
A multidimensional (MDS) plot showed no population stratification exists and also there were no differences in allele frequencies among the population.
